# Supplementary material for: Characterizing core microbiota and regulatory functions of the pig gut microbiome
Source: PubMed Central journal article supplement (PMC10873858; doi:10.1093/ismejo/wrad037), 2024-01-12
Supplement: clean_revised_supplementary_figure_legends.pdf [file clean_revised_supplementary_figure_legends.pdf]

## Supplementary Material Legends

**Fig. S1 Analyses of gut microbial NR gene numbers and diversity of gut microbial NR genes in pigs.** **A** The number of gut microbial NR genes quantified in 112 pigs from seven breeds. **B** Shannon indexes of gut microbial NR genes quantified in 112 pigs from seven breeds. **C** PCoA of gut microbial NR genes quantified in 112 pigs from seven breeds. Data are presented as mean  $\pm$  SEM ( $n = 8$ ) and were evaluated by the Kruskal-Wallis test.  $**p < 0.01$ .

**Fig. S2 Comparative analyses of gut microbial KEGG pathways in pigs.** Comparative analyses of the relative abundances of microbial genes involved in KEGG pathways, including biosynthesis of unsaturated fatty acids (**A**), secondary bile acid biosynthesis (**B**), tryptophan metabolism (**C**), phenylalanine metabolism (**D**), propanoate metabolism (**E**), butanoate metabolism (**F**), purine metabolism (**G**), pyrimidine metabolism (**H**), methane metabolism (**I**), and nitrogen metabolism (**J**), benzoate degradation (**K**), and dioxin degradation (**L**), respectively. Data are presented as the mean  $\pm$  SEM ( $n = 8$ ). Significantly differentially abundant KEGG pathways were identified using the Kruskal-Wallis test.  $**p < 0.01$ ,  $*p < 0.05$ ; ns, not significant.

**Fig. S3 Correlation analysis of gut microbial species and antimicrobial resistance genes.** Heatmap for the Spearman's correlation analysis of microbial species (relative abundance  $>0.5\%$ ) and antimicrobial resistance genes.  $**p < 0.01$ ,  $*p < 0.05$ .

**Fig. S4 Correlation analysis of gut microbial species and antimicrobial resistance types.** Heatmap for the Spearman's correlation analysis of microbial species (relative abundance  $>0.5\%$ ) and antimicrobial resistance types.  $**p < 0.01$ ,  $*p < 0.05$ .

**Fig. S5 Rarefaction curves and heatmap analysis of gut bacterial community as revealed using 16S rRNA gene sequencing.** **A** Rarefaction curves for Chao index. **B** Heatmap analysis of bacterial genera.

30

31 **Fig. S6 Gut microbial taxonomic compositions in seven pig breeds. A-D** Gut  
32 microbial taxonomic compositions, including kingdom (A), class (B), order (C), and  
33 family (D), as revealed using metagenomics. **E-G** Gut bacterial taxonomic  
34 compositions, including class level (E), order level (F), and family level (G), as  
35 revealed using 16S rRNA gene sequencing.

36

37 **Fig. S7 Heatmap analysis of relative abundances of three core-predominant**  
38 **microbial species. A** Heatmap analysis of relative abundances of *P. succinatutens*, *P.*  
39 *copri*, and *O. valericigenes* in the feces of the mice (FMT group) revealed by  
40 metagenomics. **B** Heatmap analysis of relative abundances of *O. valericigenes* in the  
41 feces of the mice (SPF group) revealed using 16S rRNA gene sequencing.

42

43 **Fig. S8 Effects of core-predominant microbes on composition of fecal metabolites**  
44 **in germ-free mice. A-C** OPLS-DA for fecal metabolites in mice from groups (Ctrl and  
45 PS) (A), groups (Ctrl and PC) (B), groups (Ctrl and OV) (C) (Ctrl, control; PS, *P.*  
46 *succinatutens*; PC, *P. copri*; OV, *O. valericigenes*). **D-F** Volcano plot analysis of fecal  
47 metabolites in mice from groups (Ctrl and PS) (D), groups (Ctrl and PC) (E), and groups  
48 (Ctrl and OV) (F). **G** Venn diagram analysis of the fecal metabolites that are upregulated  
49 by the treatments with the three core gut microbes, respectively. **H** Venn diagram  
50 analysis of the fecal metabolites that are downregulated by the treatments with the three  
51 core gut microbes, respectively. **I-K** The KEGG enrichment analyses of the fecal  
52 metabolites altered by the treatments with *P. succinatutens* (I), *P. copri* (J), and *O.*  
53 *valericigenes* (K), respectively. **L** UpSet plot comparing the KEGG pathways enriched  
54 with the fecal differentially metabolites induced by the treatments with *P. succinatutens*,  
55 *P. copri*, and *O. valericigenes*, respectively. The differentially abundant metabolites  
56 were assessed based on  $VIP \geq 1$  from the OPLS-DA, absolute  $\text{Log}_2$  (fold change)  $\geq 1$ ,  
57 and  $p$  value  $< 0.05$ .

58

59 **Fig. S9 Analyses of complete genome sequences of core-predominant microbes. A**

60 Circular representation of genome of *P. succinatutens* (PS, *P. succinatutens*). **B** KEGG  
61 pathway classification of *P. succinatutens* at level 2. **C** Venn diagram analysis of the  
62 KEGG pathways (level 3) annotated in *P. succinatutens* and the KEGG pathways (level  
63 3) enriched by the fecal metabolites in GF mice that were orally administrated with *P.*  
64 *succinatutens*. **D** Circular representation of genome of *P. copri* (PC, *P. copri*). **E** KEGG  
65 pathway classification of *P. copri* at level 2. **F** Venn diagram analysis of the KEGG  
66 pathways (level 3) annotated in *P. copri* and the KEGG pathways (level 3) enriched by  
67 the fecal metabolites in GF mice that were orally administrated with *P. copri*. **G** Circular  
68 representation of genome of *O. valericigenes* (OV, *O. valericigenes*). **H** KEGG  
69 pathway classification of *O. valericigenes* at level 2. **I** Venn diagram analysis of the  
70 KEGG pathways (level 3) annotated in *O. valericigenes* and the KEGG pathways (level  
71 3) enriched by the fecal metabolites in GF mice that were orally administrated with *O.*  
72 *valericigenes*.

73
