# Supplementary material for: Characterizing core microbiota and regulatory functions of the pig gut microbiome
Source: PubMed Central journal article supplement (PMC10873858; doi:10.1093/ismejo/wrad037), 2024-01-12

A

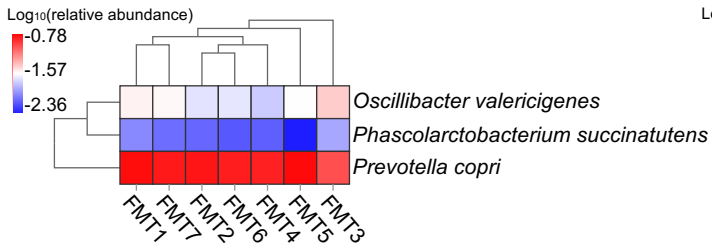

B

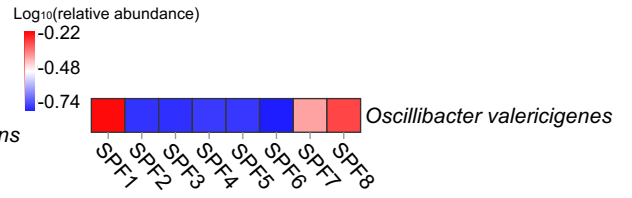

Supplement: supplementary_figure_7_wrad037.pdf [file supplementary_figure_7_wrad037.pdf]
